# Supplementary material
Source: PubMed Central journal article supplement (PMC4037742)
Supplement: NIHMS372515-supplement-Supplementary_Data.pdf [file NIHMS372515-supplement-Supplementary_Data.pdf]

Supplementary Table S1: Genotype-phenotype correlation in 12 families with two recessive *NPHP2/INVS* mutations<sup>1</sup>

| Family individual                            | Nucleotide change        | Amino acid change <sup>2</sup>       | Kidney                                                                             | Eye       | CNS           | Liver     | Clinical diagnosis                  | Others  | Ref. No. |
|----------------------------------------------|--------------------------|--------------------------------------|------------------------------------------------------------------------------------|-----------|---------------|-----------|-------------------------------------|---------|----------|
|                                              |                          |                                      | Dysplast.                                                                          | Dysplast. | Dysplast.     | Dysplast. |                                     |         |          |
|                                              |                          |                                      | Degen.                                                                             | Degen.    | Degen.        | Degen.    |                                     |         |          |
| <b>Patients with 2 truncating mutations</b>  |                          |                                      |                                                                                    |           |               |           |                                     |         |          |
| A128-21                                      | c.1453del1<br>c.2059del1 | p.Q485fsX509 (h)<br>p.R687fsX732 (h) | PKD, ESRD 7 mo                                                                     | -         | -             | -         | NPHP                                | HC      | 12       |
| A8-21                                        | c.1807C>T                | p.R603X (H)                          | PKD, ESRD 14 mo                                                                    | -         | -             | -         | NPHP                                | VSD, SI | 9        |
| A205-21<br>A205-22<br>A205-23                | c.2695C>T                | p.R899X (H)                          | -23: PKD, ESRD 19 mo, normal kidneys, r.k. 6.1 cm, l.k. 7.0 cm                     | -         | -             | -         | -21: autism<br>-22: CF<br>-23: NPHP | -       | 12       |
| A6-21                                        | c.1453del1<br>c.2695C>T  | p.Q485fsX509 (h)<br>p.R899X (h)      | PKD, ESRD <2 yr                                                                    | -         | -             | -         | NPHP                                | -       | 9        |
| A995-22                                      | c.2695C>T c.<br>2719C>T  | p.R899X (h)<br>p.R907X (h)           | PKD, ESRD 1 yr 7 mo                                                                | ONA       | hydrocephalus |           | JBTS?                               | asthma  | -        |
| A1423-21<br>A1423-23                         | c.2716G>T                | p.E906X (H)                          | PKD, ESRD 1 yr (-21), 1 yr 7 mo (-23)                                              | -         | -             | -         | NPHP                                | -       | novel    |
| A2035-21<br>A2035-22                         | c.2716G>T                | p.E906X (H)                          | PKD, ESRD 1 yr 4 mo                                                                | -         | -             | -         | NPHP                                | -21: AC | novel    |
| A12-21<br>A12-22                             | c.2719C>T                | p.R907X (H)                          | PKD, ESRD 2 yr 6 mo                                                                | -         | -             | -         | NPHP                                | -       | 9        |
| F103-21                                      | c.2719C>T                | p.R907X (H)                          | PKD, ESRD <2 yr                                                                    | TRD       | -             | -         | SLSN                                | -       | -        |
| F868-21<br>F868-23                           | c.2719C>T c.<br>2747dup1 | p.R907X (h)<br>p.K916fsX1002 (h)     | PKD, ESRD 5 yr (-21), 3 yr (-23), enlarged kidneys, r.k. 8.6 cm, l.k. 8.6 cm (-23) | -         | -             | -         | NPHP                                | -       | 9        |
| <b>Patients with 1 truncating mutation</b>   |                          |                                      |                                                                                    |           |               |           |                                     |         |          |
| A9-21                                        | c.1186C>T c.<br>1445C>G  | p.R396X (h)<br>p.P482R (h)           | PKD, ESRD <2 yr                                                                    | -         | -             | -         | NPHP                                | -       | 9        |
| <b>Patients without truncating mutations</b> |                          |                                      |                                                                                    |           |               |           |                                     |         |          |
| A7-21                                        | c.1478T>C                | p.L493S (H)                          | PKD, ESRD 4 yr                                                                     | -         | -             | -         | NPHP                                | -       | 9        |

<sup>1</sup> Clinical data partially reported (Otto *et al.* 2003, Otto *et al.* 2008); <sup>2</sup> Truncating mutations and missense mutations are shown in red and black fonts, respectively; Dysplastic phenotypes are shown in purple characters and degenerative phenotypes in green characters; cDNA mutation numbering is based on human reference sequence NM\_014425.2. AC, aortic contraction; CF, cystic fibrosis; ESRD, end-stage renal disease; HC, hypertrophic cardiomyopathy; JBTS, Joubert syndrome; NPHP, nephronophthisis; ONA, optic nerve atrophy; PKD, polycystic kidney disease; SI, *situs inversus*; SLSN, Senior-Løken syndrome; TRD, tapeto-retinal degeneration; VSD, ventricular septal defect.



Supplementary Table S2: Genotype-phenotype correlation in 8 families with two recessive *NPHP3* mutations<sup>1</sup>

| Family individual                               | Nucleotide change         | Amino acid change <sup>2</sup>             | Kidney                                                  | Eye       | CNS         | Liver     | Clinical diagnosis | Others                                                                                  | Ref. No. |
|-------------------------------------------------|---------------------------|--------------------------------------------|---------------------------------------------------------|-----------|-------------|-----------|--------------------|-----------------------------------------------------------------------------------------|----------|
|                                                 |                           |                                            | Dysplast.                                               | Dysplast. | Dysplast.   | Dysplast. |                    |                                                                                         |          |
|                                                 |                           |                                            | Degen.                                                  | Degen.    | Degen.      | Degen.    |                    |                                                                                         |          |
| <b>Patients with 2 truncating mutations</b>     |                           |                                            |                                                         |           |             |           |                    |                                                                                         |          |
| A1937-24                                        | c.3235C>T                 | p.Q1079X (H)                               | nphp, ESRD 8 yr 7 mo                                    | -         | MTS, VH, MR | -         | JBTS               | -                                                                                       | novel    |
| A1633-22                                        | c.3702del1                | p.K1234fsX1246 (H)                         | enlarged kidneys, passed away at day 3                  | -         | CVH         | -         | MKS                | ASD, double outlet RV, PVS, PH, asplenia, SA, congenital contractures (oligohydramnios) | novel    |
| F86-21<br>F86-22                                | c.3775C>T                 | p.R1259X (H)                               | nphp, ESRD 12 yr (-21), 13 yr (-22); -21: small kidneys | -         | -           | -         | NPHP               | -                                                                                       | 12       |
| A14-21                                          | c.1275del1                | p.I426fsX444 (H)                           | nphp, ESRD <12 yr                                       | -         | -           | -         | NPHP               | -                                                                                       | 7        |
| <b>Patients with 1 truncating mutation</b>      |                           |                                            |                                                         |           |             |           |                    |                                                                                         |          |
| F23-21<br>F23-22<br>F23-23                      | c.1079T>C c.1381G>T       | p.S360T (h)<br>p.E461X (h)                 | nphp                                                    | -         | -           | LF        | NPHP               | -                                                                                       | 7        |
| A11-21                                          | c.435_438del4 c.3571-1G>C | p.S146fsX148 (h)<br>oblig. splice site (h) | nphp                                                    | -         | -           | LF        | NPHP               | -                                                                                       | 6        |
| <b>Patients with only splice site mutations</b> |                           |                                            |                                                         |           |             |           |                    |                                                                                         |          |
| F624-21<br>F624-22                              | c.3812+1G>A               | oblig. splice site (H)                     | nphp, ESRD 7 yr (-21), 10 yr (-22)                      | -         | -           | -         | NPHP               | -                                                                                       | 7        |
| A1125-21<br>A1125-22                            | c.3812+2T>C               | oblig. splice site (H)                     | nphp, ESRD 3 yr 8 mo (-21), 4 yr (-22)                  | -         | -           | -         | NPHP               | -                                                                                       | 12       |

<sup>1</sup>Clinical data partially reported (Olbrich *et al.* 2003, Hoefele *et al.* 2007, Otto *et al.* 2008); <sup>2</sup>Truncating mutations, missense mutations and splice site mutations are shown in red, black and blue fonts, respectively; Dysplastic phenotypes are shown in purple characters and degenerative phenotypes in green characters, ESRD onset <4 yrs is considered to be dysplastic; cDNA mutation numbering is based on human reference sequence NM\_153240.3. ASD, atrial septal defect; CVH, cerebellar vermis hypoplasia; ESRD, end-stage renal disease; JBTS, Joubert syndrome; LF, liver fibrosis; MKS, Meckel-Gruber syndrome; MR, mental retardation; MTS, molar tooth sign; NPHP, nephronophthisis; PH, pulmonary hypoplasia; PVS,

pulmonary valve stenosis; RV, right ventricle; SA, *situs ambiguous*.

Supplementary Table S3: Genotype-phenotype correlation in 22 families with two recessive *NPHP4* mutations<sup>1</sup>

| Family individual                           | Nucleotide change                | Amino acid change <sup>2</sup>     | Kidney                                                       | Eye                                         | CNS             | Liver     | Clinical diagnoses | Others                 | Ref. No. |
|---------------------------------------------|----------------------------------|------------------------------------|--------------------------------------------------------------|---------------------------------------------|-----------------|-----------|--------------------|------------------------|----------|
|                                             |                                  |                                    | Dysplast.                                                    | Dysplast.                                   | Dysplast.       | Dysplast. |                    |                        |          |
|                                             |                                  |                                    | Degen.                                                       | Degen.                                      | Degen.          | Degen.    |                    |                        |          |
| <b>Patients with 2 truncating mutations</b> |                                  |                                    |                                                              |                                             |                 |           |                    |                        |          |
| F892-21<br>F892-22                          | c.148del1<br>c.<br>1892_1895del4 | p.V50fsX79 (h)<br>p.Q631fsX699 (h) | nphp, small kidneys                                          | -                                           | -               | -         | NPHP               | chronic bronchitis     | 5        |
| F1241-21                                    | c.175C>T                         | p.R59X (H)                         | nphp                                                         | -                                           | -               | -         | NPHP               | -                      | 12       |
| A2305-21<br>A2305-23                        | c.305del1                        | p.N102fsX177 (H)                   | nphp, -21: large kidneys, -23: normal kidney size            | -                                           | -               | -         | NPHP               | -                      | -        |
| F32-21<br>F32-22                            | c.<br>1334_1335delin<br>STC>AA   | p.F445X (H)                        | nphp, ESRD 20 yr (-21), 19 yr (-22)                          | -                                           | -               | -         | NPHP               | -                      | 8        |
| F88-22                                      | c.1462C>T                        | p.R488X (H)                        | nphp, small kidneys, ESRD 14 yr                              | -                                           | -               | -         | NPHP               | -                      | 5        |
| F60-31<br>F60-32<br>F60-33<br>F60-34        | c.1972C>T                        | p.R658X (H)                        | nphp, ESRD 10 yr (-31), 22 yr (-32), 17 yr (-33), 6 yr (-34) | TRD (-31, -32)<br>-33: LCA<br>-34: coloboma | -               | -         | SLSN               | -                      | 8        |
| F3-21<br>F3-23                              | c.2335C>T                        | p.Q779X (H)                        | nphp, ESRD 30 yr (-21), 28 yr (-22)                          | LCA                                         | -               | LF        | SLSN               | deafness               | 8        |
| F622-22<br>F622-23                          | c.2368G>T                        | p.E790X (H)                        | nphp, ESRD 8 yr (-22), 9 yr (-23)                            | -                                           | -               | -         | NPHP               | -                      | 8        |
| F1270-22<br>F1270-23                        | c.2368G>T                        | p.E790X (H)                        | nphp, small kidneys, -23: ESRD 14 yr                         | -                                           | -               | -         | NPHP               | -23: mild HI           | 12       |
| A2324-21<br>A2324-23                        | c.<br>2618_2619insA              | p.H873fsX886 (H)                   | nphp, ESRD 7 yr                                              | -21: TRD                                    | MR,<br>-21: OMA | -         | -23: JBTS          | -                      | novel    |
| F617-21                                     | c.<br>2598_2607dup10             | p.R870fsX890 (H)                   | nphp, ESRD 17 yr, small kidneys                              | TRD                                         | DD              | -         | Usher syndrome     | splenomegaly, deafness | 5        |
| F1183-21                                    | c.3010dup1                       | p.T1004fsX1102 (H)                 | nphp, ESRD 13 yr                                             | -                                           | -               | -         | NPHP               | -                      | 12       |

|                            |                          |                                       |                                                                       |                  |   |   |                       |   |    |
|----------------------------|--------------------------|---------------------------------------|-----------------------------------------------------------------------|------------------|---|---|-----------------------|---|----|
| F698-21<br>F698-22         | c.3068G>A c.<br>3403del1 | p.W1023X (h)<br>p.R1135fsX1144<br>(h) | nphp, ESRD 21 yr<br>(-21), 11 yr (-22)                                | -                | - | - | NPHP                  | - | 15 |
| F704-22                    | c.<br>3149_3150insC      | p.Q1050fsX1102<br>(H)                 | nphp, small<br>kidneys, ESRD 9<br>yr                                  | -                | - | - | NPHP                  | - | 5  |
| F30-22<br>F30-23<br>F30-24 | c.3272del1               | p.V1091fsX1121<br>(H)                 | nphp, ESRD 18 yr<br>(-22), 22 yr (-21,<br>-23); -23: small<br>kidneys | -24: TRD         | - | - | SLSN                  | - | 8  |
| A206-21<br>A206-22         | c.3272dup1               | p.V1091fsX1102<br>(H)                 | nphp, ESRD 16 yr,<br>small kidneys                                    | -22:<br>coloboma | - | - | -21: NPHP<br>-22: PRS | - | 12 |

| Family<br>individua                             | Nucleotide<br>change       | Amino acid<br>change <sup>2</sup>                   | Kidney                                 | Eye       | CNS       | Liver     | Clinical<br>diagnosis | Others | Ref. No. |
|-------------------------------------------------|----------------------------|-----------------------------------------------------|----------------------------------------|-----------|-----------|-----------|-----------------------|--------|----------|
|                                                 |                            |                                                     | Dysplast.                              | Dysplast. | Dysplast. | Dysplast. |                       |        |          |
|                                                 |                            |                                                     | Degen.                                 | Degen.    | Degen.    | Degen.    |                       |        |          |
| <b>Patients with 1 truncating mutation</b>      |                            |                                                     |                                        |           |           |           |                       |        |          |
| F461-31<br>F461-33<br>F461-34                   | c.2044C>T c.<br>2542C>T    | p.R682X (h)<br>p.R848W (h)                          | nphp, small<br>kidneys                 | -         | -         | -         | NPHP                  | -      | 8        |
| F962-21<br>F962-22<br>F962-23                   | c.305del1<br>c.3364A>C     | p.N102fsX177 (h)<br>p.T1122P (h)                    | nphp, ESRD 13 yr<br>(-22)              | -         | -         | -         | NPHP                  | -      | 15       |
| <b>Patients without truncating mutations</b>    |                            |                                                     |                                        |           |           |           |                       |        |          |
| F720-21                                         | c.1405C>T c.<br>1961C>G    | p.R469W (h)<br>p.A654G (h)                          | nphp, enlarged<br>kidneys              | -         | -         | LF?       | NPHP                  | -      | 5        |
| F456-21                                         | c.2836A>G                  | p.T946A (H)                                         | nphp, small<br>kidneys, ESRD 24<br>yr  | TRD       | -         | -         | SLSN                  | -      | 5        |
| F24-21<br>F24-22                                | c.2260G>A c.<br>2144-1G>C  | p.G754R (h)<br>oblig. splice site<br>(h)            | nphp                                   | -         | -         | -         | NPHP                  | -      | 8        |
| <b>Patients with only splice site mutations</b> |                            |                                                     |                                        |           |           |           |                       |        |          |
| F444-21<br>F444-22                              | c.1955+1G>A<br>c.3472+1G>A | oblig. splice site<br>(h) oblig. splice<br>site (h) | nphp, ESRD 33 yr<br>(-21), 23 yr (-22) | -         | -         | -         | NPHP                  | -      | 8        |

<sup>1</sup>Clinical data partially reported (Otto *et al* 2002, Hoefele *et al* 2005, Otto *et al* 2008, Otto *et al* 2010); <sup>2</sup>Truncating mutations, missense mutations and splice site mutations are shown in red, black and blue fonts, respectively; Dysplastic phenotypes are shown in purple characters and degenerative

phenotypes in green characters; cDNA mutation numbering is based on human reference sequence NM\_015102.2. DD, developmental delay; ESRD, end-stage renal disease; HI, hearing impairment; JBTS, Joubert syndrome; LCA, Leber's congenital amaurosis; LF, liver fibrosis; MR, mental retardation; NPHP, nephronophthisis; OMA, oculomotor apraxia type Cogan; PRS, papillo-renal syndrome; SLSN, Senior-Løken syndrome; TRD, tapeto-retinal degeneration.

Supplementary Table S4: Genotype-phenotype correlation in 25 families with two recessive *NPHP5/IQCB1* mutations<sup>1</sup>

| Family individual                           | Nucleotide change              | Amino acid change <sup>2</sup>       | Kidney                                            | Eye       | CNS      | Liver    | Clinical diagnosis | Others                                         | Ref. No. |
|---------------------------------------------|--------------------------------|--------------------------------------|---------------------------------------------------|-----------|----------|----------|--------------------|------------------------------------------------|----------|
|                                             |                                |                                      | Dysplast.                                         | Dysplast. | Dysplast | Dysplast |                    |                                                |          |
|                                             |                                |                                      | Degen.                                            | Degen.    | Degen.   | Degen.   |                    |                                                |          |
| <b>Patients with 2 truncating mutations</b> |                                |                                      |                                                   |           |          |          |                    |                                                |          |
| F1-21<br>F1-22                              | c.424_425del2                  | p.F142fsX146 (H)                     | nphp, ESRD 15 yr (-21), 12 yr (-22)               | TRD       | -        | -        | SLSN               | -                                              | 10       |
| A567-21                                     | c.424_425del2                  | p.F142fsX146 (H)                     | nphp, ESRD 47 yr                                  | TRD       | -        | -        | SLSN               | -                                              | 12       |
| F399-21                                     | c.424_425del2                  | p.F142fsX146 (H)                     | nphp, ESRD 32 yr                                  | TRD       | -        | -        | SLSN               | father has cystic kidneys, bronchitis          | 10       |
| F408-21                                     | c.424_425del2                  | p.F142fsX146 (H)                     | nphp, ESRD 8 yr                                   | TRD       | -        | -        | SLSN               | -                                              | 10       |
| F409-21                                     | c.424_425del2                  | p.F142fsX146 (H)                     | nphp, ESRD <17 yr                                 | TRD       | -        | -        | SLSN               | asthma                                         | 10       |
| F53-22                                      | c.445_448del4                  | p.L149fsX179 (H)                     | nphp                                              | TRD       | -        | -        | SLSN               | -                                              | 10       |
| F269-21                                     | c.445_448del4<br>c.825_828del4 | p.L149fsX179 (h)<br>p.R275fsX280 (h) | nphp, ESRD 37 yr                                  | TRD       | -        | -        | SLSN               | carcinoma in the r.k., tumor in the left ovary | 10       |
| F2-21                                       | c.994C>T                       | p.R332X (H)                          | nphp                                              | TRD       | -        | -        | SLSN               | -                                              | 10       |
| F189-21                                     | c.994C>T                       | p.R332X (H)                          | nphp, ESRD <13 yr                                 | TRD       | -        | -        | SLSN               | -                                              | 10       |
| A371-21                                     | c.825_828del4<br>c.1069C>T     | p.R275fsX280 (h)<br>p.Q357X (h)      | nphp                                              | TRD       | -        | -        | SLSN               | -                                              | -        |
| A19-21                                      | c.825_828del4<br>c.1069C>T     | p.R275fsX280 (h)<br>p.Q357X (h)      | nphp, ESRD <15 yr                                 | TRD       | -        | -        | SLSN               | -                                              | 10       |
| F64-23<br>F64-24                            | c.<br>1074_1075dup2            | p.A359fsX361 (H)                     | nphp, ESRD <20 yr                                 | TRD       | -        | -        | SLSN               | -                                              | -        |
| F1146-21<br>F1146-22                        | c.<br>1074_1075dup2            | p.A359fsX361 (H)                     | nphp, ESRD 12 yr (-21), 13 yr (-22)               | TRD       | -        | -        | SLSN               | -                                              | 10       |
| A1175-21                                    | c.1332G>A                      | p.W444X (H)                          | nphp, ESRD 7 yr                                   | TRD       | -        | -        | SLSN               | -                                              | 10       |
| F353-21                                     | c.1363C>T                      | p.R455X (H)                          | nphp, ESRD 6 yr                                   | TRD       | -        | -        | SLSN               | -                                              | novel    |
| F1395-21                                    | c.1381C>T                      | p.R461X (H)                          | nphp, ESRD 14 yr, small kidneys                   | TRD       | -        | -        | SLSN               | -                                              | 12       |
| A132-41<br>A132-45<br>A132-46               | c.1381C>T                      | p.R461X (H)                          | nphp, ESRD <12 yr (-41), <8 yr (-45), <6 yr (-46) | TRD       | -        | -        | RHYNS syndrome     | -                                              | 10       |
| A389-26                                     | c.1465C>T                      | p.R489X (H)                          | nphp, ESRD <8 yr                                  | TRD       | -        | -        | SLSN               | -                                              | 12       |



|                                                 |                     |                                |                                                                      |           |          |          |                    |                 |          |
|-------------------------------------------------|---------------------|--------------------------------|----------------------------------------------------------------------|-----------|----------|----------|--------------------|-----------------|----------|
| F14-22<br>F14-23                                | c.<br>1518_1519del2 | p.H506fsX518 (H)               | nphp, ESRD <11 yr (-22), <14 yr (-23)                                | LCA       | -        | -        | SLSN               | -               | -        |
| F50-21<br>F50-23                                | c.<br>1518_1519del2 | p.H506fsX518 (H)               | nphp, ERD 12 yr (-21), >13 yr (-23)                                  | TRD       | -        | -        | SLSN               | -               | 10       |
| F54-21                                          | c.<br>1518_1519del2 | p.H506fsX518 (H)               | nphp, ESRD <24 yr                                                    |           | -        | -        | SLSN               | -               | 10       |
| Family individual                               | Nucleotide change   | Amino acid change <sup>2</sup> | Kidney                                                               | Eye       | CNS      | Liver    | Clinical diagnosis | Others          | Ref. No. |
|                                                 |                     |                                | Dysplast.                                                            | Dysplast. | Dysplast | Dysplast |                    |                 |          |
|                                                 |                     |                                | Degen.                                                               | Degen.    | Degen.   | Degen.   |                    |                 |          |
| F1175-21                                        | c.<br>1518_1519del2 | p.H506fsX518 (H)               | nphp, small kidneys, ESRD <10 yr                                     | TRD       | -        | -        | SLSN               | ES              | 12       |
| F1298-22                                        | c.<br>1518_1519del2 | p.H506fsX518 (H)               | nphp, ESRD 15 yr, normal kidney size                                 | TRD       | -        | -        | SLSN               | -               | 10       |
| <b>Patients with only splice site mutations</b> |                     |                                |                                                                      |           |          |          |                    |                 |          |
| A364-23                                         | c.488-1G>A          | oblig. splice site (H)         | nphp, normal kidney size                                             | TRD       | -        | -        | SLSN               | -               | 12       |
| A1538-21<br>A1538-22                            | c.1130-1G>C         | oblig. splice site (H)         | nphp, ESRD <12 yr,<br>-21: small kidneys,<br>-22: normal kidney size | TRD       | -        | -        | SLSN               | -21: syndactyly | novel    |

<sup>1</sup> Clinical data partially reported (Otto *et al* 2005, Otto *et al* 2008); <sup>2</sup> Truncating mutations, missense mutations and splice site mutations are shown in red, black and blue fonts, respectively; Dysplastic phenotypes are shown in purple characters and degenerative phenotypes in green characters; cDNA mutation numbering is based on human reference sequence NM\_001023570.1. ES, epileptic seizure; ESRD, end-stage renal disease; LCA, Leber's congenital amaurosis; NPHP, nephronophthisis; RHYNS, retinitis pigmentosa-hypopituitarism-nephronophthisis-mild skeletal dysplasia; SLSN, Senior-Løken syndrome; TRD, tapeto-retinal degeneration.

Supplementary Table S5: Genotype-phenotype correlation in 19 families with two recessive *NPHP6/CEP290* mutations<sup>1</sup>

| Family individual                           | Nucleotide change                  | Amino acid change <sup>2</sup>             | Kidney                                 | Eye                 | CNS                              | Liver     | Clinical diagnosis | Others   | Ref. No. |
|---------------------------------------------|------------------------------------|--------------------------------------------|----------------------------------------|---------------------|----------------------------------|-----------|--------------------|----------|----------|
|                                             |                                    |                                            | Dysplast.                              | Dysplast.           | Dysplast.                        | Dysplast. |                    |          |          |
|                                             |                                    |                                            | Degen.                                 | Degen.              | Degen.                           | Degen.    |                    |          |          |
| <b>Patients with 2 truncating mutations</b> |                                    |                                            |                                        |                     |                                  |           |                    |          |          |
| F57-21                                      | c.1A>G,<br>c.1419_1423del5         | start codon defect (h)<br>p.K473fsX478 (h) | nphp                                   | TRD,<br>keratoconus | -                                | -         | SLSN               | ES       | 4        |
| A197-21                                     | c.3175_3176insA<br>c.7341_7342insA | p.I1059fsX1069 (h)<br>p.L2448fsX2455 (h)   | nphp, ESRD 9.5 yr                      | retinal phenotype   | -                                | -         | JBTS               | -        | 17       |
| A1713-21<br>A1713 -22                       | c.5182G>T<br>c.6277del1            | p.E1728X (h)<br>p.V2093fsX2096 (h)         | nphp                                   | LCA                 | mild CM                          | -         | JBTS?              | -        | 15       |
| A1388-21                                    | c.136G>T<br>c.5649_5650insA        | p.E46X (h)<br>p.L1884fsX1906 (h)           | nphp, enlarged kidneys, ESRD 7 yr 5 mo | OA                  | CVA, MR                          | -         | JBTS               | deafness | 15       |
| A372-21<br>A372-22                          | c.3811C>T c.<br>5734del1           | p.R1271X (h)<br>p.W1912fsX1923 (h)         | nphp                                   | coloboma,<br>LCA    | MR                               | -         | JBTS               | -        | 4        |
| F63-21                                      | c.4656del1 c.<br>5668G>T           | p.K1552fsX1556 (h)<br>p.G1890X (h)         | nphp, ESRD 12 yr                       | TRD                 | CVA, EC, MR                      | -         | JBTS               | -        | 17       |
| A1715-21                                    | c.5311G>T<br>c.5445_5448del4       | p.E1771X (h)<br>p.L1815fsX1818 (h)         | nphp                                   | TRD                 | MR                               | -         | JBTS               | -        | 15       |
| F89-21                                      | c.5515_5518del4<br>c.5649_5650insA | p.E1843fsX1849 (h)<br>p.L1883fsX1906 (h)   | nphp, ESRD 11 yr                       | ONA                 | CVA, MR                          | -         | JBTS               | -        | 17       |
| F15-21<br>F15-24                            | c.5649_5650insA<br>c.5850del1      | p.L1884fsX1906 (h)<br>p.F1950fsX1964 (h)   | nphp                                   | LCA                 | cerebellar involvement           | -         | JBTS?              | -        | 15       |
| F394-27                                     | c.5668G>T                          | p.G1890X (H)                               | nphp, enlarged kidneys, ESRD 3 yr      | coloboma            | CVH,<br>microcephaly, MR         | -         | JBTS               | ataxia   | 15       |
| F700-24<br>F700-26                          | c.5668G>T                          | p.G1890X (H)                               | nphp, ESRD 10 yr (-24)                 | sight problem       | MR; -24:<br>CVH, -26:<br>CVA, EC | -         | JBTS               | -24: ES  | 17       |
| F944-31<br>F944-32                          | c.5668G>T                          | p.G1890X (H)                               | nphp, ESRD 13 yr (-31), 11 yr (-32)    | -                   | -                                | -         | JBTS               | -        | 17       |

|                                            |                           |                                              |                          |     |                           |    |      |   |    |
|--------------------------------------------|---------------------------|----------------------------------------------|--------------------------|-----|---------------------------|----|------|---|----|
| A1188-21                                   | c.5668G>T                 | p.G1890X (H)                                 | nphp, normal kidney size | -   | CVA, MR                   | -  | JBTS | - | 15 |
| A989-21                                    | c.4882C>T<br>c.5941G>T    | p.Q1628X (h)<br>p.E1981X (h)                 | nphp, ESRD 5 yr<br>2 mo  | TRD | CVA, MR                   | LF | JBTS | - | 4  |
| <b>Patients with 1 truncating mutation</b> |                           |                                              |                          |     |                           |    |      |   |    |
| A2029-21                                   | c.1189G>A c.<br>5668G>T   | p.G397S (h)<br>p.G1890X (h)                  | nphp, ESRD 2 yr          | LCA | brain anomaly,<br>MTS, MR | -  | JBTS | - | 15 |
| F101-21                                    | c.5163del1<br>c.1066-1G>A | p.T1721fsX1723 (h)<br>oblig. splice site (h) | nphp                     | TRD | -                         | -  | SLSN | - | 4  |

| Family individual                               | Nucleotide change     | Amino acid change <sup>2</sup> | Kidney                               | Eye       | CNS              | Liver     | Clinical diagnosis | Others | Ref. No. |
|-------------------------------------------------|-----------------------|--------------------------------|--------------------------------------|-----------|------------------|-----------|--------------------|--------|----------|
|                                                 |                       |                                | Dysplast.                            | Dysplast. | Dysplast.        | Dysplast. |                    |        |          |
|                                                 |                       |                                | Degen.                               | Degen.    | Degen.           | Degen.    |                    |        |          |
| <b>Patients without truncating mutations</b>    |                       |                                |                                      |           |                  |           |                    |        |          |
| F335-21<br>F335-22                              | c.2915T>C             | p.L972P (H)                    | -21: nphp, ESRD <13 yr; -22: no nphp | TRD       | -                | -         | SLSN               | -      | 15       |
| <b>Patients with only splice site mutations</b> |                       |                                |                                      |           |                  |           |                    |        |          |
| F4-21<br>F4-22                                  | c.2218-4<br>_2222del9 | oblig. splice site (H)         | nphp, ESRD 11 yr (-21), 13 yr (-22)  | TRD       | -                | -         | SLSN               | -      | 17       |
| A2182-21<br>A2182-22                            | c.2217+1G>T           | oblig. splice site (H)         | nphp, ESRD 13 yr (-21), 8 yr (-22)   | TRD       | microcephaly, MR | -         | JBTS               | -      | novel    |

<sup>1</sup> Clinical data partially reported (Sayer *et al* 2006, Helou *et al* 2007, Otto *et al* 2010); <sup>2</sup> Truncating mutations, missense mutations and splice site mutations are shown in red, black and blue fonts, respectively; Dysplastic phenotypes are shown in purple characters and degenerative phenotypes in green characters, ESRD onset <4 yr is considered to be dysplastic; cDNA mutation numbering is based on human reference sequence NM\_025114.3. CM, cerebellum malformation; CVA, cerebellar vermis aplasia; CVH, cerebellar vermis hypoplasia; EC, encephalocele occ.; ES, epileptic seizure; ESRD, end-stage renal disease; JBTS, Joubert syndrome; LCA, Leber's congenital amaurosis; LF, liver fibrosis; MR, mental retardation; MTS, molar tooth sign; NPHP, nephronophthisis; OA, ocular albinism; ONA, optic nerve atrophy; SLSN, Senior-Løken syndrome; TRD, tapeto-retinal degeneration.

Supplementary Table S6: Genotype-phenotype correlation in 8 families with two recessive *NPHP8/ RPGRIP1L* mutations<sup>1</sup>

| Family individual                            | Nucleotide change          | Amino acid change <sup>2</sup>  | Kidney                                   | Eye       | CNS                                                                    | Liver     | Clinical diagnosis | Others                                          | Ref. No. |
|----------------------------------------------|----------------------------|---------------------------------|------------------------------------------|-----------|------------------------------------------------------------------------|-----------|--------------------|-------------------------------------------------|----------|
|                                              |                            |                                 | Dysplast.                                | Dysplast. | Dysplast.                                                              | Dysplast. |                    |                                                 |          |
| I                                            |                            |                                 | Degen.                                   | Degen.    | Degen.                                                                 | Degen.    |                    |                                                 |          |
| <b>Patients with 1 truncating mutation</b>   |                            |                                 |                                          |           |                                                                        |           |                    |                                                 |          |
| A2424-21                                     | c.721_724del4<br>c.1829A>C | p.N241fsX265 (h)<br>p.H610P (h) | PKD                                      | -         | DWM, EC                                                                | -         | MKS                | polydactyly                                     | 15       |
| A188-23                                      | c.1841A>C c.2050C>T        | p.T615P (h)<br>p.Q684X (h)      | no nphp at age 5 yrs                     | -         | MTS, DD, small EC, strabismus, abnormal eye movement, bilateral ptosis | -         | JBTS/MKS?          | postaxial hand polydactyly, dysmorphic features | 1        |
| A177-21                                      | c.1975T>C<br>c.2413C>T     | p.S659P (h)<br>p.R805X (h)      | nphp, ESRD <5 yr                         | -         | MTS                                                                    | CLF       | COACH syndrome     | BDA                                             | 3        |
| <b>Patients without truncating mutations</b> |                            |                                 |                                          |           |                                                                        |           |                    |                                                 |          |
| F138-21<br>F138-22                           | c.1843A>C                  | p.T615P (H)                     | nphp, ESRD 10 yr, small kidneys          | -         | CVA; -21: mutism, MR, OMA                                              | -         | JBTS               | -                                               | 19       |
| A166-22<br>A166-23                           | c.1843A>C                  | p.T615P (H)                     | nphp, ESRD 4 yr 2 mo, normal kidney size | -         | -22: MR, -23: MTS                                                      | -         | JBTS               | -                                               | 19       |
| A762-21                                      | c.1897T>C                  | p.C633R (H)                     | nphp, small kidneys, ESRD 9 yr 8 mo      | -         | OMA                                                                    | -         | NPHP               | -                                               | 19       |
| A1367-21<br>A1367-22                         | c.2083G>C                  | p.A695P (H)                     | nphp, ESRD 9r (-21), 8 yr (-22)          | -         | OMA, Nys                                                               | -         | NPHP               | scoliosis                                       | 11       |
| A1685-21<br>A1685-22                         | c.2450A>G                  | p.Y817C (H)                     | nphp, ESRD 17 yr (-21), 15 yr (-22)      | -         | MR, OMA                                                                | -         | JBTS?              | -                                               | novel    |

<sup>1</sup>Clinical data partially reported (Arts *et al* 2007, Wolf *et al* 2007, Delous *et al* 2007, Otto *et al* 2010, Doherty *et al* 2010); <sup>2</sup>Truncating mutations and missense mutations are shown in red and black fonts, respectively; Dysplastic phenotypes are shown in purple characters and degenerative phenotypes in green characters, ESRD onset <4 yrs is considered to be dysplastic; cDNA mutation numbering is based on human reference sequence NM\_015272.2. BDA, bile ductile abnormality; CLF, congenital liver fibrosis; COACH, cerebellar vermis hypo/aplasia-oligophrenia-congenital ataxia-ocular coloboma-hepatic fibrosis; CVA, cerebellar vermis aplasia; DD, developmental delay; DWM, Dandy-Walker malformation; EC, encephalocele occ.; ESRD, end-stage renal disease; JBTS, Joubert syndrome; MKS, Meckel-Gruber syndrome; MR, mental retardation; MTS, molar

tooth sign; NPHP, nephronophthisis; Nys, nystagmus; OMA, oculomotor apraxia type Cogan.

Supplementary Table S7: Genotype-phenotype correlation in 7 families with two recessive *NPHP10/SDCCAG8* mutations<sup>1</sup>

| Family individual                               | Nucleotide change        | Amino acid change <sup>2</sup>           | Kidney                                     | Eye                                                      | CNS                       | Liver     | Clinical diagnosis | Others         | Ref. No. |
|-------------------------------------------------|--------------------------|------------------------------------------|--------------------------------------------|----------------------------------------------------------|---------------------------|-----------|--------------------|----------------|----------|
|                                                 |                          |                                          | Dysplast.                                  | Dysplast.                                                | Dysplast.                 | Dysplast. |                    |                |          |
| I                                               |                          |                                          | Degen.                                     | Degen.                                                   | Degen.                    | Degen.    |                    |                |          |
| <b>Patients with 2 truncating mutations</b>     |                          |                                          |                                            |                                                          |                           |           |                    |                |          |
| F159-21<br>F159-22                              | c.421-?_740+?<br>del     | p.E141_R247del107<br>fs (H)              | nphp, ESRD 11 yr<br>(-21), 7 yr (-22)      | -21: TRD<br>-22: normal                                  | -                         | -         | SLSN?              | -22: GS        | 14       |
| F336-21<br>F336-22                              | c.1339_340insG           | p.E447fsX463 (H)                         | nphp, ESRD 7 yr<br>(-21), 4 yr (-22)       | flat ERG (-21:<br>13 yr, -22: 6<br>yr)                   | -21: mild<br>MR           | -         | SLSN?              | -              | 14       |
| A1365-21<br>A1365-22                            | c.1420del1               | p.E474fsX493 (H)                         | nphp, ESRD 4 yr<br>(-21), 14 yr (-22)      | TRD, -21: 30%<br>vision (14 yr),<br>-22: blind (7<br>yr) | -                         | -         | SLSN               | -              | 14       |
| F1054-21<br>F1054-22                            | c.1796T>G                | p.L599X (H)                              | nphp, ESRD <10<br>yr<br>(-21), <9 yr (-22) | -                                                        | -                         | -         | NPHP               | -21: POS       | 14       |
| F195-21                                         | c.<br>1946_1949del4      | p.C649fsX658 (H)                         | nphp, ESRD 22 yr                           | TRD                                                      | -                         | -         | SLSN               | -              | 14       |
| <b>Patients with 1 truncating mutation</b>      |                          |                                          |                                            |                                                          |                           |           |                    |                |          |
| AR37-25<br>AR37-27                              | c.696T>G c.<br>740+1del1 | p.Y232X (h)<br>oblig. splice site<br>(h) | nphp, -25: ESRD<br>22 yr, -27: no<br>ESRD  | TRD, -27: SNB                                            | -25: PN<br>-27: MR        | -         | SLSN?              | -25: OB,<br>HP | 14       |
| <b>Patients with only splice site mutations</b> |                          |                                          |                                            |                                                          |                           |           |                    |                |          |
| A2290-21                                        | c.1068+1G>A              | oblig. splice site<br>(H)                | nphp, ESRD 14 yr                           | TRD                                                      | cystic<br>brain<br>lesion | -         | SLSN?              | -              | 14       |

<sup>1</sup>Clinical data partially reported (Otto *et al* 2010); <sup>2</sup>Truncating mutations, missense mutations and splice site mutations are shown in red, black and blue fonts, respectively; Dysplastic phenotypes are shown in purple characters and degenerative phenotypes in green characters; cDNA mutation numbering is based on human reference sequence NM\_006642.2. ERG, electroretinogram; ESRD, end-stage renal disease; GS, generalized seizures; HP, hypogenitalism; MR, mental retardation; NPHP, nephronophthisis; OB, obesity; PN, peripheral neuropathy; POS, polycystic ovary syndrome; SLSN, Senior-Løken syndrome; SNB, stationary night blindness; TRD, tapeto-retinal degeneration.

Supplementary Table S8: Genotype-phenotype correlation in 20 families with two recessive *NPHP1*/*TMEM67*/*MKS3* mutations<sup>1</sup>

| Family individual                            | Nucleotide change   | Amino acid change <sup>2</sup> | Kidney                              | Eye                   | CNS                   | Liver                             | Clinical diagnosis | Others            | Ref. No. |
|----------------------------------------------|---------------------|--------------------------------|-------------------------------------|-----------------------|-----------------------|-----------------------------------|--------------------|-------------------|----------|
|                                              |                     |                                | Dysplast.<br>Degen.                 | Dysplast.<br>Degen.   | Dysplast.<br>Degen.   | Dysplast.<br>Degen.               |                    |                   |          |
| <b>Patients with 1 truncating mutation</b>   |                     |                                |                                     |                       |                       |                                   |                    |                   |          |
| F56-21                                       | c.130C>T c.2461G>C  | p.Q44X (h)<br>p.G821R (h)      | nphp                                | coloboma,<br>ONA, TRD | CVH, MR               | -                                 | JBTS               | ataxia            | 13       |
| A77-21                                       | c.622A>T c.2168A>G  | p.R208X (h)<br>p.Y723C (h)     | nphp, ESRD 7 yr, normal kidney size | ONA                   | CVH, DWM, MR          | LF                                | MKS?               | SAS               | 15       |
| A144-21                                      | c.622A>T c.2498T>C  | p.R208X (h)<br>p.I833T (h)     | nphp                                | -                     | CVA, MR               | LF                                | JBTS               | -                 | 13       |
| A971-21                                      | c.622A>T c.1843T>C  | p.R208X (h)<br>p.C615R (h)     | nphp, ESRD 7 yr                     | -                     | CVH, MR               | cholangiopathy, hepatomegaly, LF? | JBTS               | -                 | 15       |
| A3208-21<br>A3208-22                         | c.1351C>T c.2018T>C | p.R451X (h)<br>p.V673A (h)     | nphp, ESRD 19 yr                    | coloboma              | CVH, CH, MR, absences | -                                 | JBTS               | -                 | 15       |
| F480-22                                      | c.1387C>T c.2891C>T | p.R463X (h)<br>p.T964I (h)     | nphp                                | -                     | -                     | -                                 | JBTS?              | -                 | 15       |
| <b>Patients without truncating mutations</b> |                     |                                |                                     |                       |                       |                                   |                    |                   |          |
| F278-21                                      | c.755T>C c.1843T>C  | p.M252T (h)<br>p.C615R (h)     | nphp, ESRD 2 yr, very small kidneys | -                     | MR                    | LF, cholangiodysplasia            | JBTS               | ataxia            | 15       |
| F190-22                                      | c.755T>C c.1843T>C  | p.M252T (h)<br>p.C615R (h)     | nphp, small kidneys, ESRD <7 yr     | coloboma              | MR, OMA               | LF                                | JBTS?              | ataxia            | 13       |
| F90-21                                       | c.755T>C c.1843T>C  | p.M252T (h)<br>p.C615R (h)     | nphp, small kidneys, ESRD 5.5 yr    | TRD                   | CVA, MR               | LF                                | JBTS               | polydactyly       | 15       |
| F96-21<br>F96-22                             | c.755T>C c.2498T>C  | p.M252T (h)<br>p.I833T (h)     | nphp, ESRD 22 yr                    | coloboma              | CVH, MR               | -                                 | JBTS               | ataxia            | 15       |
| A1011-21                                     | c.868G>T c.1843T>C  | p.W290L (h)<br>p.C615R (h)     | nphp, ESRD 8 yr                     | -                     | OD                    | LF                                | NPHP/JBTS          | -                 | 13       |
| F631-21                                      | c.1045T>C c.1843T>C | p.L349S (h)<br>p.C615R (h)     | nphp                                | coloboma              | MR                    | LF                                | JBTS               | -                 | 15       |
| F519-21                                      | c.1843T>C           | p.C615R (H)                    | nphp, enlarged kidneys, ESRD 6 yr   | -                     | MR                    | LF                                | JBTS               | splenomegaly, EDS | 13       |

| F585-21                       | c.1843T>C                | p.C615R (H)                           | nphp, ESRD 6 yr                                 | TRD                | general BA                       | LF                 | JBTS?              | -                      | 13       |
|-------------------------------|--------------------------|---------------------------------------|-------------------------------------------------|--------------------|----------------------------------|--------------------|--------------------|------------------------|----------|
| F315-21                       | c.1843T>C<br>c.1911C>A   | p.C615R (h)<br>p.F637L (h)            | nphp, ESRD <9 yr                                | -                  | CVA, MR                          | LF                 | JBTS               | -                      | 15       |
| Family individual             | Nucleotide change        | Amino acid change <sup>2</sup>        | Kidney                                          | Eye                | CNS                              | Liver              | Clinical diagnosis | Others                 | Ref. No. |
|                               |                          |                                       | Dysplast.                                       | Dysplast.          | Dysplast.                        | Dysplast.          |                    |                        |          |
|                               |                          |                                       | Degen.                                          | Degen.             | Degen.                           | Degen.             |                    |                        |          |
| A1371-21<br>A1371-22          | c.1888T>C                | p.S630P (H)                           | nphp, ESRD 8 yr (-21), <10 yr (-22)             | LCA, -21: coloboma | CVA, -21: PR, strabismus, ptosis | LF                 | NPHP               | -21: ataxia<br>-22: HI | 13       |
| F563-21<br>F563-22<br>F563-23 | c.2461G>A                | p.G821S (H)                           | nphp, ESRD 14 yr (-21), >8 yr (-22), 9 yr (-23) | -                  | -                                | LF                 | NPHP               | -                      | 13       |
| F1039-21                      | c.2461G>C                | p.G821R (H)                           | nphp, ESRD 10 yr                                | -                  | mild BA                          | LF                 | JBTS?              | myopic, moronic        | 13       |
| F459-21<br>F459-22            | c.986A>C c.2556+1G>A     | p.K329T (h)<br>oblig. splice site (h) | nphp, passed away at 46 yr                      | coloboma           | CVH, MR                          | LF                 | JBTS?              | ataxia                 | 15       |
| A123-21                       | c.1769T>C<br>c.1961-2A>C | p.F590S (h)<br>oblig. splice site (h) | nphp                                            | coloboma           | MTS, MR, Nys, OMA, DD, hypotonia | CLF, hepatomegal y | COACH syndrome     | EV                     | 2        |

<sup>1</sup>Clinical data partially reported (Brancati *et al* 2009, Otto *et al* 2009, Otto *et al* 2010); <sup>2</sup>Truncating mutations, missense mutations and splice site mutations are shown in red, black and blue fonts, respectively; Dysplastic phenotypes are shown in purple characters and degenerative phenotypes in green characters, ESRD onset <4 yrs is considered to be dysplastic; cDNA mutation numbering is based on human reference sequence NM\_153704.5. BA, brain atrophy; CH, cerebellar hypoplasia; CLF, congenital liver fibrosis; CVA, cerebellar vermis aplasia; CVH, cerebellar vermis hypoplasia; DD, developmental delay; DWM, Dandy-Walker malformation; EDS, Ehlers-Danlos syndrome; ESRD, end-stage renal disease; EV, esophageal varices; HI, hearing impairment; JBTS, Joubert syndrome; LF, liver fibrosis; MR, mental retardation; MTS, molar tooth sign; NPHP, nephronophthisis; Nys, nystagmus; OD, oculocerebral disease; OMA, oculomotor apraxia type Cogan; ONA, optic nerve atrophy; PR, psychomotor retardation; SAS, subvalvular aortic stenosis; TRD, tapeto-retinal degeneration.



Supplementary Table S9: Genotype-phenotype correlation in 6 families with two recessive *AHI1* mutations<sup>1</sup>

| Family individual                               | Nucleotide change         | Amino acid change <sup>2</sup>         | Kidney                                       | Eye       | CNS               | Liver     | Clinical diagnosis | Others    | Ref. No. |
|-------------------------------------------------|---------------------------|----------------------------------------|----------------------------------------------|-----------|-------------------|-----------|--------------------|-----------|----------|
|                                                 |                           |                                        | Dysplast.                                    | Dysplast. | Dysplast.         | Dysplast. |                    |           |          |
|                                                 |                           |                                        | Degen.                                       | Degen.    | Degen.            | Degen.    |                    |           |          |
| <b>Patients with 2 truncating mutations</b>     |                           |                                        |                                              |           |                   |           |                    |           |          |
| F400-21                                         | c.365_688del324 c.443dup1 | p.Q123-L230del (h)<br>p.N148fsX149 (h) | no nphp                                      | coloboma  | MTS               | -         | JBTS               | -         | 18       |
| A185-21                                         | c.736A>T c.2495T>G        | p.K246X (h)<br>p.L832X (h)             | nphp, MCDK                                   | TRD       | MTS, OMA, Nys     | -         | NPHP/JBTS          | diabetes  | 16       |
| A191-21                                         | c.1267C>T c.2212C>T       | p.Q423X (h)<br>p.R738X (h)             | nphp                                         | TRD       | MTS, OMA, Nys     | -         | NPHP/JBTS          | tachypnea | 16       |
| F799-22<br>F799-24                              | c.2368_2369insT           | p.N790fsX791 (H)                       | nphp, ESRD 16 yr (-24), no nphp 20 yrs (-22) | -         | MR, PDD, OMA, Nys | -         | JBTS?              | ataxia    | 18       |
| A2045-21                                        | c.2172del1                | p.I724fsX729 (H)                       | nphp, ESRD 17 yr                             | -         | -                 | -         | NPHP/JBTS          | -         | novel    |
| <b>Patients with only splice site mutations</b> |                           |                                        |                                              |           |                   |           |                    |           |          |
| A176-21                                         | c.2036+1 G>T              | oblig. splice site (H)                 | nphp                                         | TRD       | MTS, Nys          | -         | NPHP/JBTS          | tachypnea | 16       |

<sup>1</sup> Clinical data partially reported (Utsch *et al* 2006, Parisi *et al* 2006); <sup>2</sup> Truncating mutations and splice site mutations are shown in red and blue fonts, respectively; Dysplastic phenotypes are shown in purple characters and degenerative phenotypes in green characters; cDNA mutation numbering is based on human reference sequence NM\_017651.3. ESRD, end-stage renal disease; JBTS, Joubert syndrome; MCDK, multicystic dysplastic kidneys; MR, mental retardation; MTS, molar tooth sign; NPHP, nephronophthisis; Nys, nystagmus; OMA, oculomotor apraxia type Cogan; PDD, Psychomotor developmental delay; TRD, tapeto-retinal degeneration.

Supplementary Table S10: Genotype-phenotype correlation in 3 families with two recessive *CC2D2A* mutations<sup>1</sup>

| Family individual                          | Nucleotide change             | Amino acid change <sup>2</sup>     | Kidney                     | Eye       | CNS          | Liver     | Clinical diagnosis | Others                           | Ref. No. |
|--------------------------------------------|-------------------------------|------------------------------------|----------------------------|-----------|--------------|-----------|--------------------|----------------------------------|----------|
|                                            |                               |                                    | Dysplast.                  | Dysplast. | Dysplast.    | Dysplast. |                    |                                  |          |
| I                                          |                               |                                    | Degen.                     | Degen.    | Degen.       | Degen.    |                    |                                  |          |
| <b>Patients with 1 truncating mutation</b> |                               |                                    |                            |           |              |           |                    |                                  |          |
| A2426-21                                   | c.685_687del3<br>c.3893T>A    | p.E229del (h)<br>p.V1298D (h)      | PKD                        | -         | EC           | -         | MKS                | bone-cartilage junction disarray | 15       |
| F434-21                                    | c.517C>T<br>c.1676T>C         | p.R173X (h)<br>p.L559P (h)         | nphp, kidney problem >3 yr | -         | CVH, MR, OMA | -         | JBTS               | ataxia, muscle hypotonia         | 15       |
| A2421-21                                   | c.3544T>C c.<br>3774_3775insT | p.W1182R (h)<br>p.E1259fsX1260 (h) | PKD                        | -         | EC           | -         | MKS                | hepatic developmental defects    | 15       |

<sup>1</sup>Clinical data partially reported (Otto *et al* 2010); <sup>2</sup>Truncating mutations and missense mutations are shown in red and black fonts, respectively; Dysplastic phenotypes are shown in purple characters and degenerative phenotypes in green characters, ESRD onset <4 yrs is considered to be dysplastic; cDNA mutation numbering is based on human reference sequence NM\_001080522.1. CVH, cerebellar vermis hypoplasia; EC, encephalocele occ.; ESRD, end-stage renal disease; JBTS, Joubert syndrome; MKS, Meckel-Gruber syndrome; MR, mental retardation; OMA, oculomotor apraxia type Cogan.

## References

1. Arts HH, Doherty D, van Beersum SEC *et al.* Mutations in the gene encoding the basal body protein RPGRIP1L, a nephrocystin-4 interactor, cause Joubert syndrome. *Nat Genet* 2007; **39**: 882-888.
2. Brancati F, Iannicelli M, Travaglini L *et al.* MKS3/TMEM67 mutations are a major cause of COACH Syndrome, a Joubert Syndrome related disorder with liver involvement. *Hum Mutat* 2009; **30**: 432-442.
3. Doherty D, Parisi MA, Finn LS *et al.* Mutations in 3 genes (MKS3, CC2D2A and RPGRIP1L) cause COACH syndrome (Joubert syndrome with congenital hepatic fibrosis). *J Med Genet* 2010; **47**: 8-21.
4. Helou J, Otto EA, Attanasio M *et al.* Mutation analysis of NPHP6/CEP290 in patients with Joubert syndrome and Senior-Loken syndrome. *J Med Genet* 2007; **44**: 657-663.
5. Hoefele J, Sudbrak R, Reinhardt R *et al.* Mutational analysis of the NPHP4 gene in 250 patients with nephronophthisis. *Hum Mutat* 2005; **25**: 411.
6. Hoefele J, Wolf MT, O'Toole JF *et al.* Evidence of oligogenic inheritance in nephronophthisis. *J Am Soc Nephrol* 2007; **18**: 2789-2795.
7. Olbrich H, Fliegau M, Hoefele J *et al.* Mutations in a novel gene, NPHP3, cause adolescent nephronophthisis, tapeto-retinal degeneration and hepatic fibrosis. *Nat Genet* 2003; **34**: 455-459.
8. Otto EA, Hoefele J, Ruf R *et al.* A gene mutated in nephronophthisis and retinitis pigmentosa encodes a novel protein, nephroretinin, conserved in evolution. *Am J Hum Genet* 2002; **71**: 1167-1171.
9. Otto EA, Schermer B, Obara T *et al.* Mutations in INVS encoding inversin cause nephronophthisis type 2, linking renal cystic disease to the function of primary cilia and left-right axis determination. *Nat Genet* 2003; **34**: 413-420.
10. Otto EA, Loey B, Khanna H *et al.* A novel ciliary IQ domain protein, NPHP5, is mutated in Senior-Loken syndrome (nephronophthisis with retinitis pigmentosa), and interacts with RPGR and calmodulin. *Nat Genet* 2005; **37**: 282-288.
11. Delous M, Baala L, Salomon R *et al.* The ciliary gene RPGRIP1L is mutated in cerebello-oculo-renal syndrome (Joubert syndrome type B) and Meckel syndrome. *Nat Genet* 2007; **39**: 875-881.
12. Otto EA, Helou J, Allen SJ *et al.* Mutation analysis in nephronophthisis using a combined approach of homozygosity mapping, CEL I

endonuclease cleavage, and direct sequencing. *Hum Mutat* 2008; **29**: 418-426.

13. Otto EA, Tory K, Attanasio M *et al*. Hypomorphic mutations in meckelin (MKS3/TMEM67) cause nephronophthisis with liver fibrosis (NPHP11). *J Med Genet* 2009; **46**: 663-670.

14. Otto EA, Hurd TW, Airik R *et al*. Candidate exome capture identifies mutation of *SDCCAG8* as the cause of a retinal-renal ciliopathy. *Nat Genet* 2010; **42**: 840-850.

15. Otto EA, Ramaswami G, Janssen S *et al*. Mutation analysis of 18 nephronophthisis associated ciliopathy disease genes using a DNA pooling and next generation sequencing strategy. *J Med Genet* 2011; **48**: 105-116.

16. Parisi MA, Doherty D, Eckert ML *et al*. AHI1 mutations cause both retinal dystrophy and renal cystic disease in Joubert syndrome. *J Med Genet* 2006; **43**: 334-339.

17. Sayer JA, Otto EA, O'Toole JF *et al*. The centrosomal protein nephrocystin-6 is mutated in Joubert syndrome and activates transcription factor ATF4. *Nat Genet* 2006; **38**: 674-681.

18. Utsch B, Sayer JA, Attanasio M *et al*. Identification of the first AHI1 gene mutations in nephronophthisis-associated Joubert syndrome. *Pediatr Nephrol* 2006; **21**: 32-35.

19. Wolf MT, Saunier S, O'Toole JF *et al*. Mutational analysis of the RPGRIP1L gene in patients with Joubert syndrome and nephronophthisis. *Kidney Int* 2007; **72**: 1520-1526.
